# Supplementary material for: Influence of a ternary donor material on the morphology of a P3HT:PCBM blend for organic photovoltaic devices
Source: Royal Society of Chemistry journal article supplement (doi:10.1039/c2jm31882b), 2012-01-01
Supplement: c2jm31882b.pdf [file c2jm31882b.pdf]

### Supplementary Information:

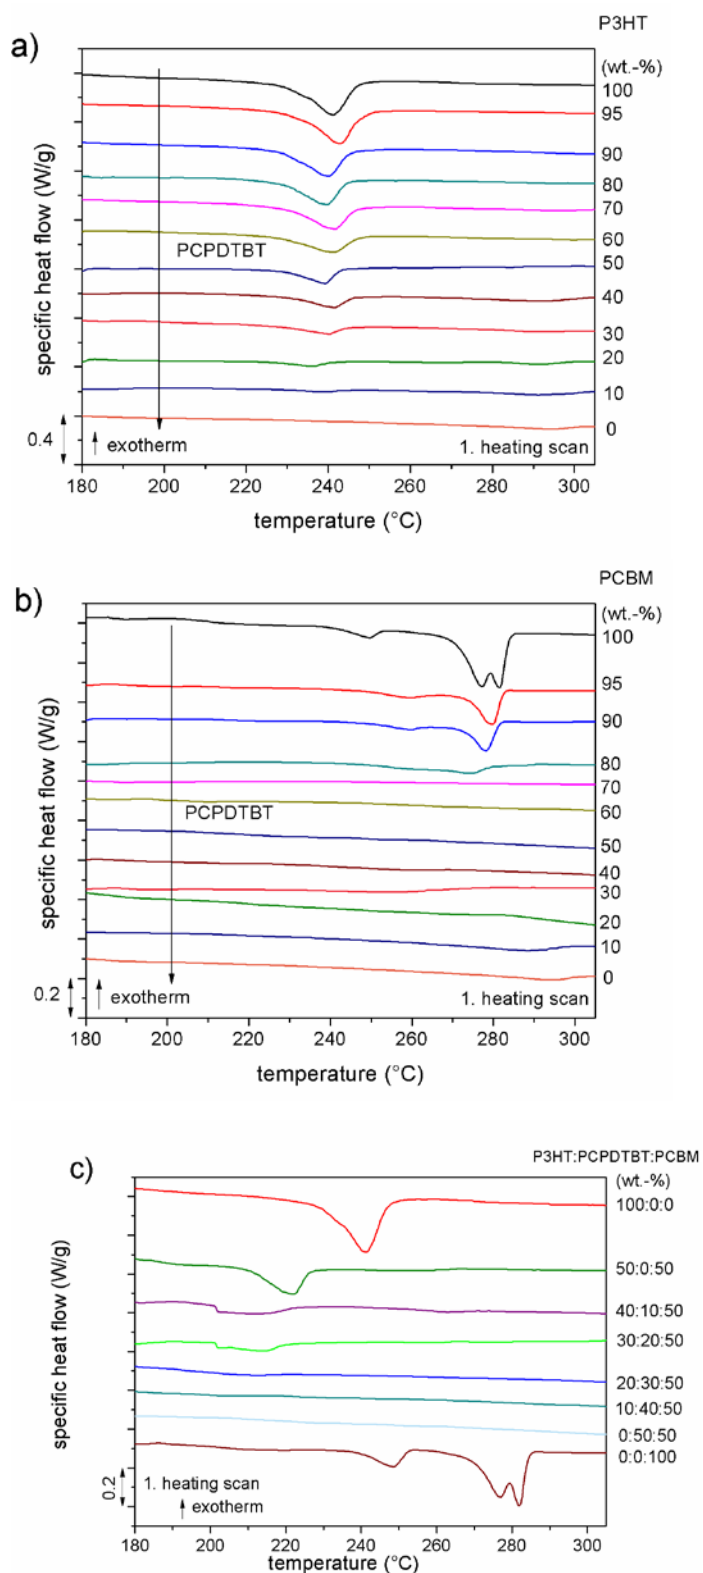

**Figure S1:** DSC thermograms (first heating scan, heating rate of 10 K min<sup>-1</sup>) of binary mixtures: a) P3HT and PCPDTBT, b) PCBM and PCPDTBT and c) ternary mixtures with 50 wt% PCBM including the neat P3HT and PCBM. Thermograms are plotted with exotherm up.

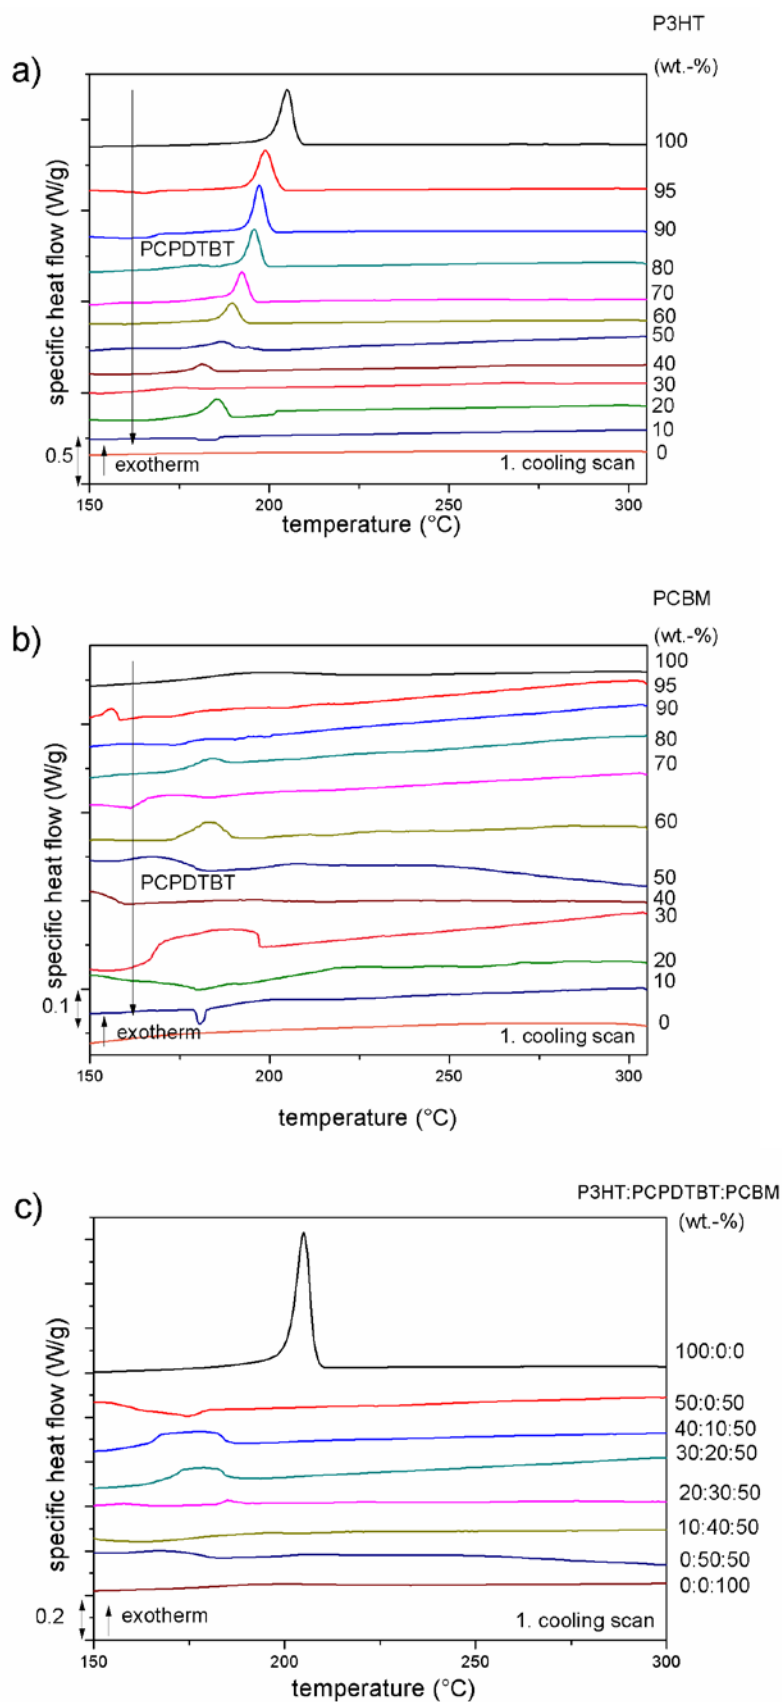

**Figure S2:** DSC thermograms (first cooling scan, cooling rate of 10 K min<sup>-1</sup>) of binary mixtures: a) P3HT and PCPDTBT, b) PCBM and PCPDTBT and c) ternary mixtures including 50 wt% PCBM and the neat P3HT and PCBM. Thermograms are plotted with exotherm up.

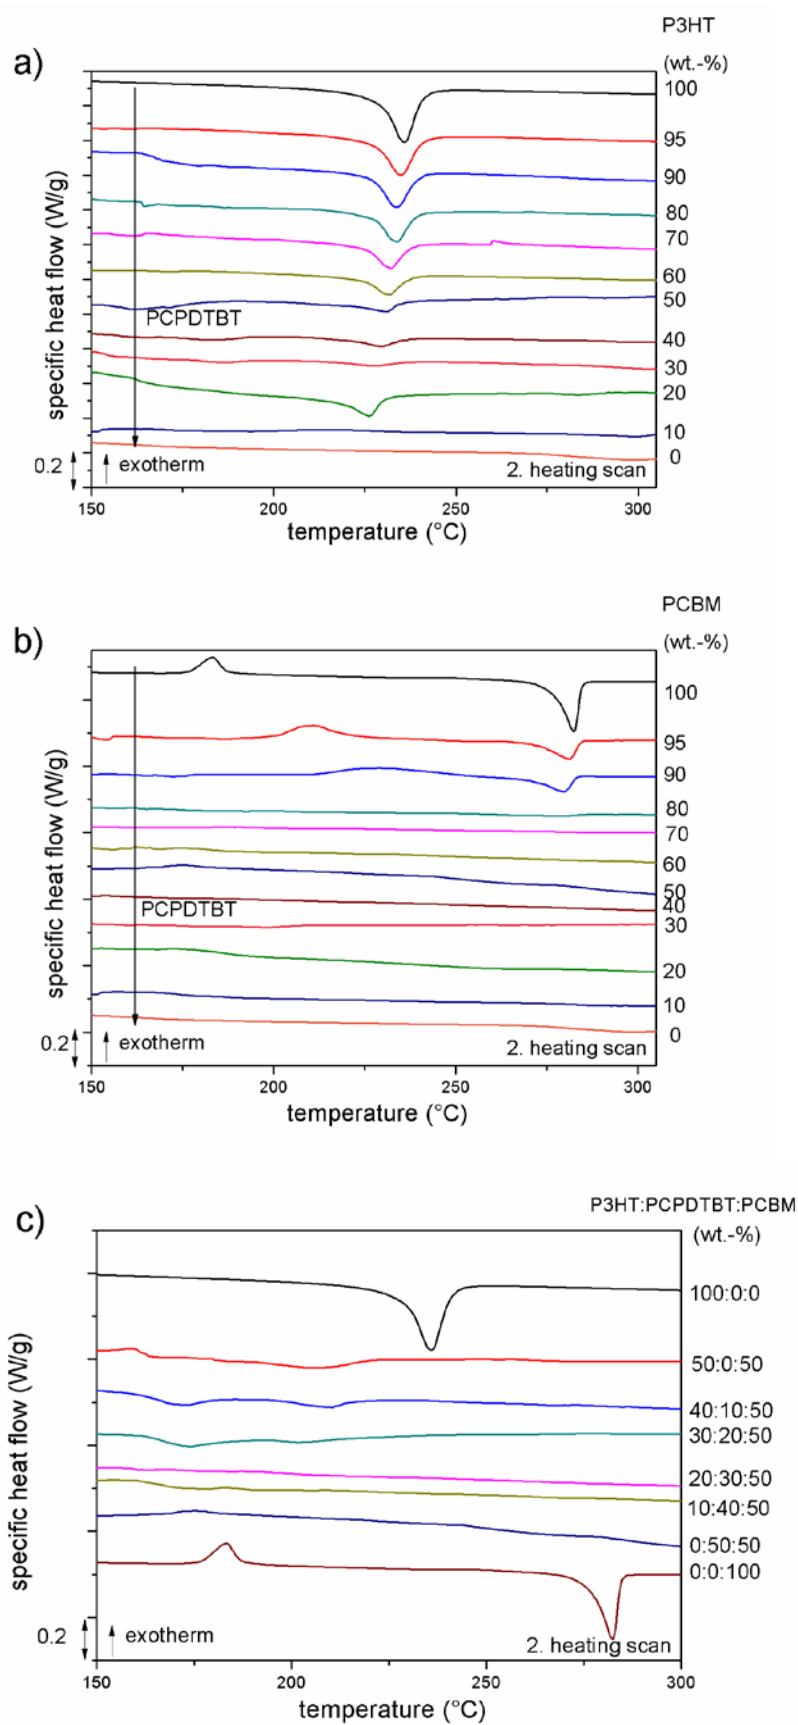

**Figure S3:** DSC thermograms (second heating scan, heating rate of  $10 \text{ K min}^{-1}$ ) of binary mixtures: a) P3HT and PCPDTBT, b) PCBM and PCPDTBT and c) ternary mixtures with 50 wt% PCBM including the neat P3HT and PCBM. Thermograms are plotted with exotherm up.

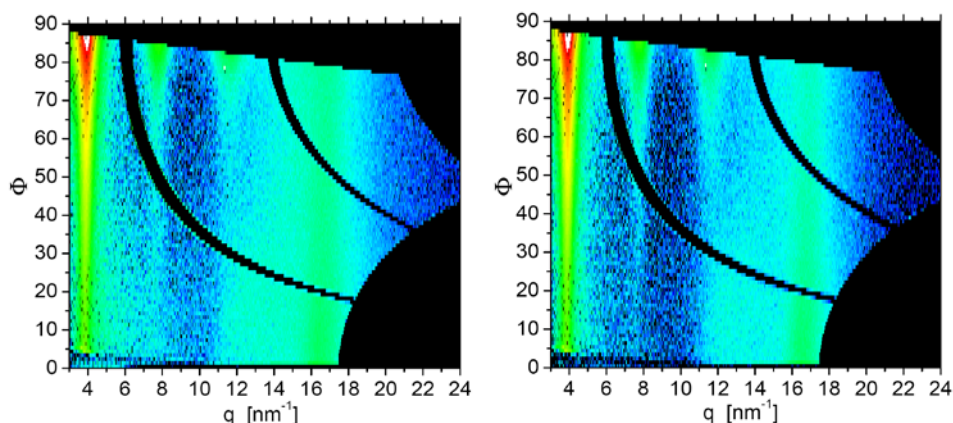

**Figure S4:** Two-dimensional GiWAXS detector pattern obtained for the as-coated and annealed P3HT films (intensity scale 10000).

For the conversion of mass fractions into volume fractions we assumed a density of about 1 g/cm<sup>3</sup> for PCPDTBT and 1.1 g/cm<sup>3</sup> for P3HT. Since PCPDTBT is less crystalline than P3HT its density should be lower than that of P3HT. For PCBM density values ranging from 1.3 g/cm<sup>3</sup> up to 1.5 g/cm<sup>3</sup> are reported [Ref. (S1-S3)]. This leads to an average PCBM volume fraction of 0.43 ± 0.02.

**Table S1:** Normalization to PCBM volume fraction

| Density PCBM<br>[g/cm <sup>3</sup> ] | P3HT:PCPDTBT wt% |       |       |       |       |      |
|--------------------------------------|------------------|-------|-------|-------|-------|------|
|                                      | 50:0             | 40:10 | 30:20 | 25:25 | 20:30 | 0:50 |
|                                      | PCBM vol%        |       |       |       |       |      |
| 1.3 Ref.(2)                          | 45               | 45    | 45    | 45    | 44    | 44   |
| 1.5 Ref.(2)                          | 42               | 42    | 41    | 41    | 41    | 41   |

**Table S2:** Device performance of ternary cells with higher PCBM content

| ratio P3HT:PCPDTBT:PCBM wt%      | Voc (V)   | Jsc<br>(mA/cm <sup>2</sup> ) | FF (%) | PCE (%) |
|----------------------------------|-----------|------------------------------|--------|---------|
| <b>polymer:fullerene 1:2 wt%</b> |           |                              |        |         |
| <b>45:15:120</b>                 | 0.56±0.01 | 3.6±0.6                      | 42±4.5 | 0.8±0.2 |
| <b>50:10:120</b>                 | 0.57±0.01 | 3.5±0.4                      | 39±0.7 | 0.8±0.1 |
| <b>polymer:fullerene 1:3 wt%</b> |           |                              |        |         |
| <b>20:05:75</b>                  | 0.48±0.02 | 4.2±0.6                      | 31±1.8 | 0.6±0.1 |
| <b>15:10:75</b>                  | 0.57±0.01 | 2.9±0.3                      | 36±2.4 | 0.6±0.1 |

## References

- S1. A.C. Arias, J. Macromol. Sci. Polym. Rev. 2006, **46**, 103.
- S2. J. W. Kiel, B. J. Kirby, C. F. Majkrzak, B. B. Maranville, M. E. Mackay, Soft Matter 2010, **6**, 641.
- S3. C. W. T. Bulle-Lieuwma, W. J. H. van Gennip, J. K. J. van Duren, et al. Appl. Surf. Sci. 2003, **203**, 547.
